# Supplementary material for: Identification of volatiles from six marine Celeribacter strains
Source: publisher site journal article supplement (doi:10.3762/bjoc.17.38), 2021-02-11
Supplement: Additional file 1 [file 1860-5397-17-38-S1.pdf]

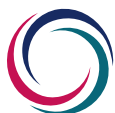

## Supporting Information

for

### Identification of volatiles from six marine *Celeribacter* strains

Anuj Kumar Chhalodia, Jan Rinkel, Dorota Konvalinkova, Jörn Petersen  
and Jeroen S. Dickschat

*Beilstein J. Org. Chem.* **2021**, *17*, 420–430. doi:10.3762/bjoc.17.38

### DMSP demethylation pathway in *Celeribacter* spp. and copies of spectra

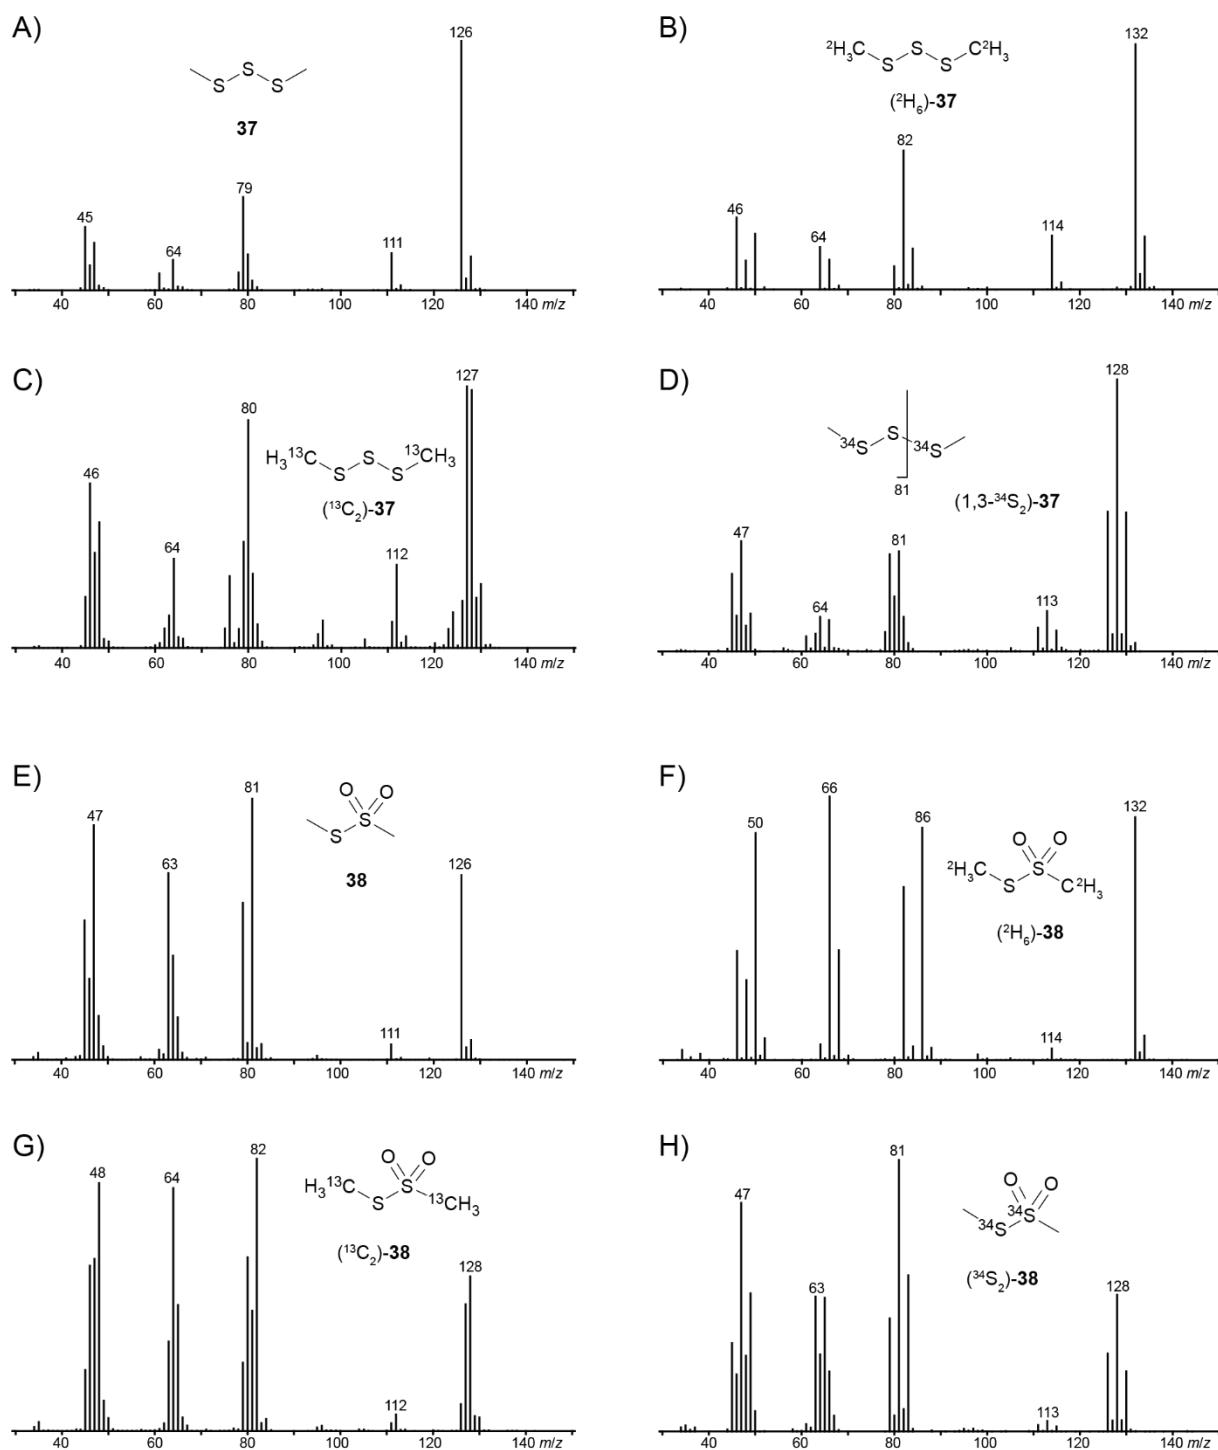

**Figure S1:** EI mass spectra of A) unlabeled dimethyl trisulfide (**37**) and of labeled **37** after feeding of B)  $[methyl-^2H_3]$ methionine, C)  $[methyl-^{13}C]$ methionine and D)  $[^{34}S]$ DMS, E) unlabeled S-methyl methanethiosulfonate (**38**) and of labeled **38** after feeding of F)  $[methyl-^2H_3]$ methionine, G)  $[methyl-^{13}C]$ methionine, and H)  $[^{34}S]$ DMS. The structures of labeled compounds show the isotopomers of maximum incorporation of labeling.

**Table S1:** The DMSP demethylation pathway in *Celeribacter* spp.

| Strain                                         | DmdA <sup>a</sup>               | DmdB <sup>a</sup>  | DmdC <sup>a</sup>  | DmdD <sup>a</sup>  |
|------------------------------------------------|---------------------------------|--------------------|--------------------|--------------------|
| <i>C. marinus</i> DSM 100036 <sup>T</sup>      | WP_062220065 (21%)              | WP_062217242 (22%) | WP_062219918 (38%) | WP_062217896 (30%) |
| <i>C. neptunius</i> DSM 26471 <sup>T</sup>     | WP_090061255 (26%) <sup>b</sup> | WP_090061186 (25%) | WP_090062142 (40%) | WP_090062168 (43%) |
| <i>C. manganoxidans</i> DSM 27541 <sup>T</sup> | WP_097373155 (21%) <sup>b</sup> | WP_097373111 (31%) | WP_097372585 (41%) | WP_088662863 (30%) |
| <i>C. baekdonensis</i> DSM 27375 <sup>T</sup>  | WP_074644298 (28%) <sup>b</sup> | WP_107720993 (32%) | WP_107720980 (46%) | WP_074641224 (43%) |
| <i>C. halophilus</i> DSM 26270 <sup>T</sup>    | WP_066599093 (25%) <sup>b</sup> | WP_066604139 (26%) | WP_066603281 (39%) | WP_066601109 (31%) |
| <i>C. indicus</i> DSM 27257 <sup>T</sup>       | –                               | WP_139267207 (27%) | WP_043868654 (40%) | WP_043869106 (42%) |

<sup>a</sup>NCBI accession numbers and % identity of the closest homologs of the functionally characterized enzymes DmdABCD from *Ruegeria pomeroyi* DSS-3 obtained by BLAST search; <sup>b</sup>identity by comparison to C-terminal domain.

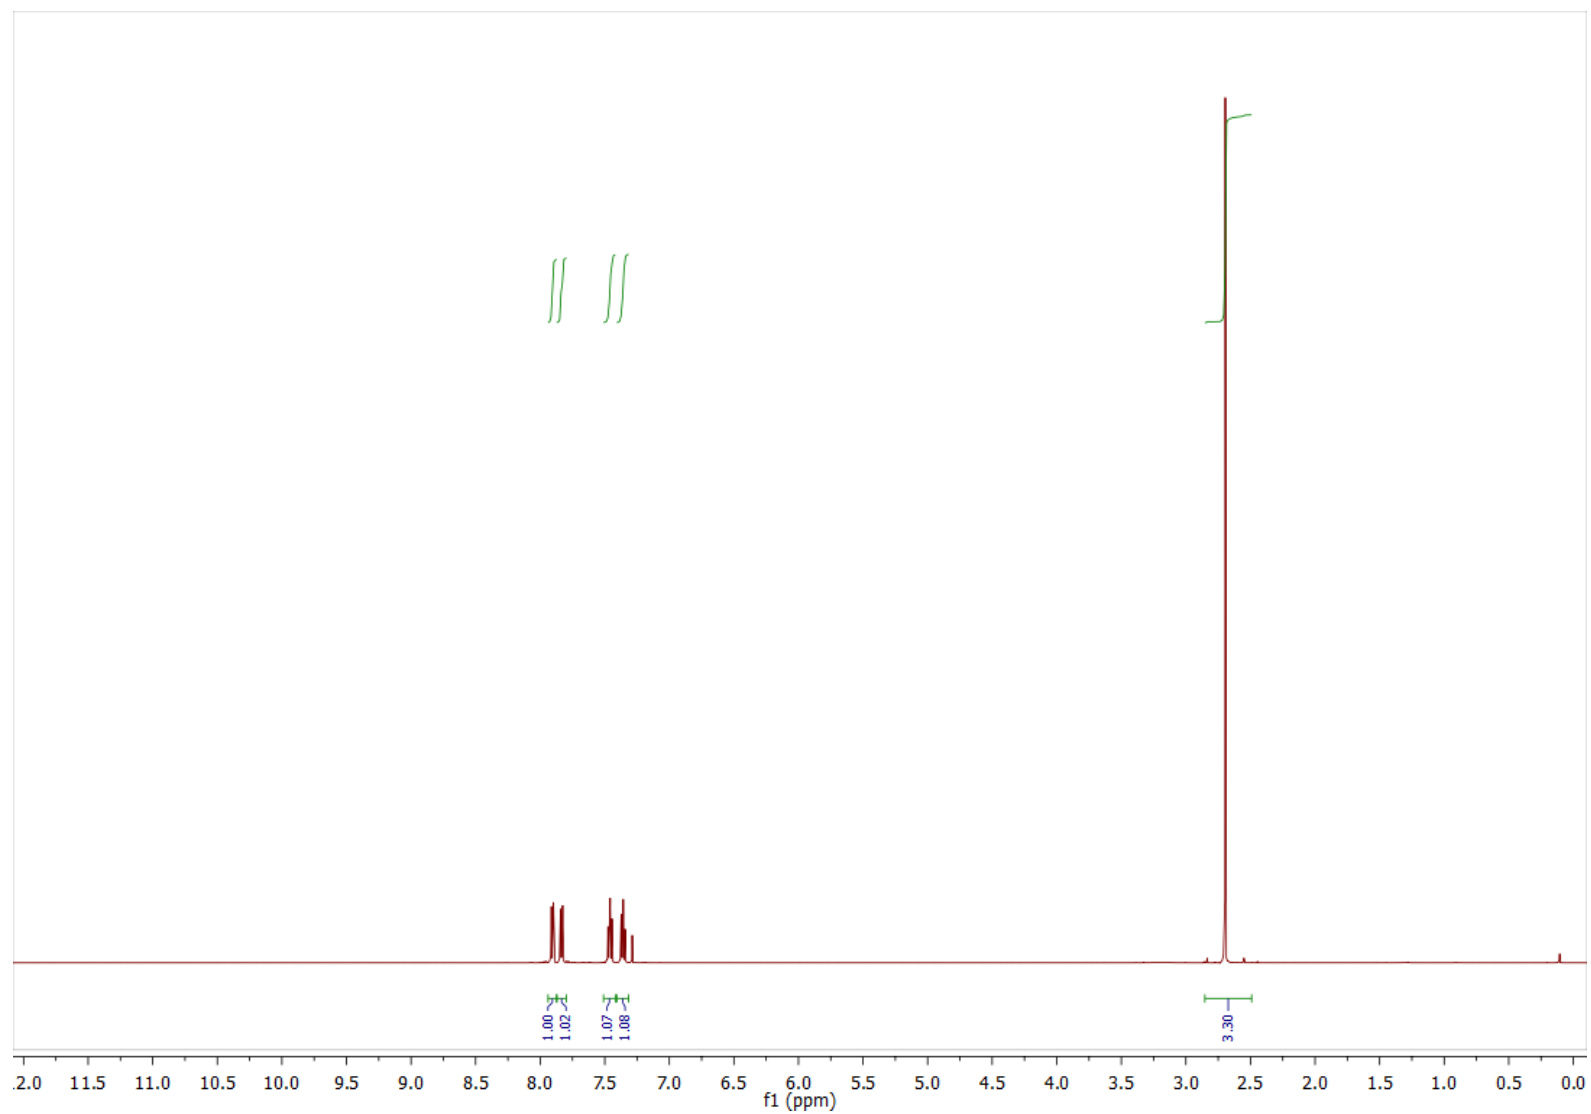

**Figure S2:**  $^1\text{H}$  NMR spectrum ( $\text{CDCl}_3$ , 500 MHz) of **41**.

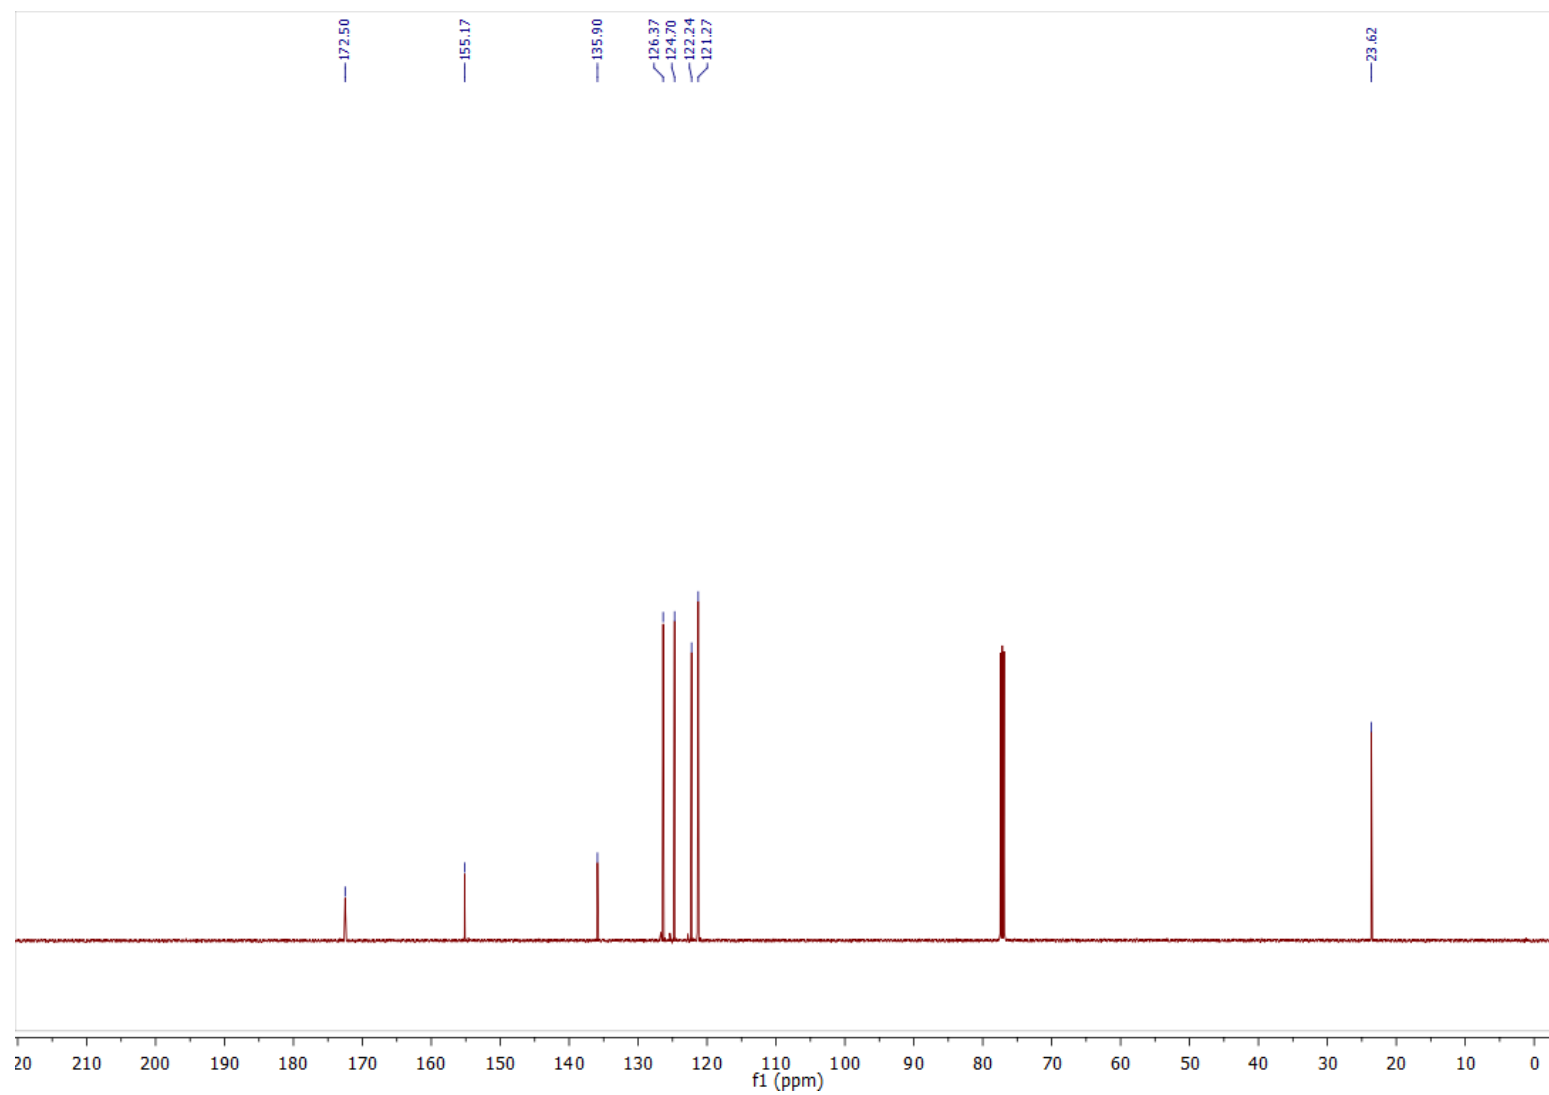

**Figure S3:**  $^{13}\text{C}$  NMR spectrum ( $\text{CDCl}_3$ , 125 MHz) of **41**.

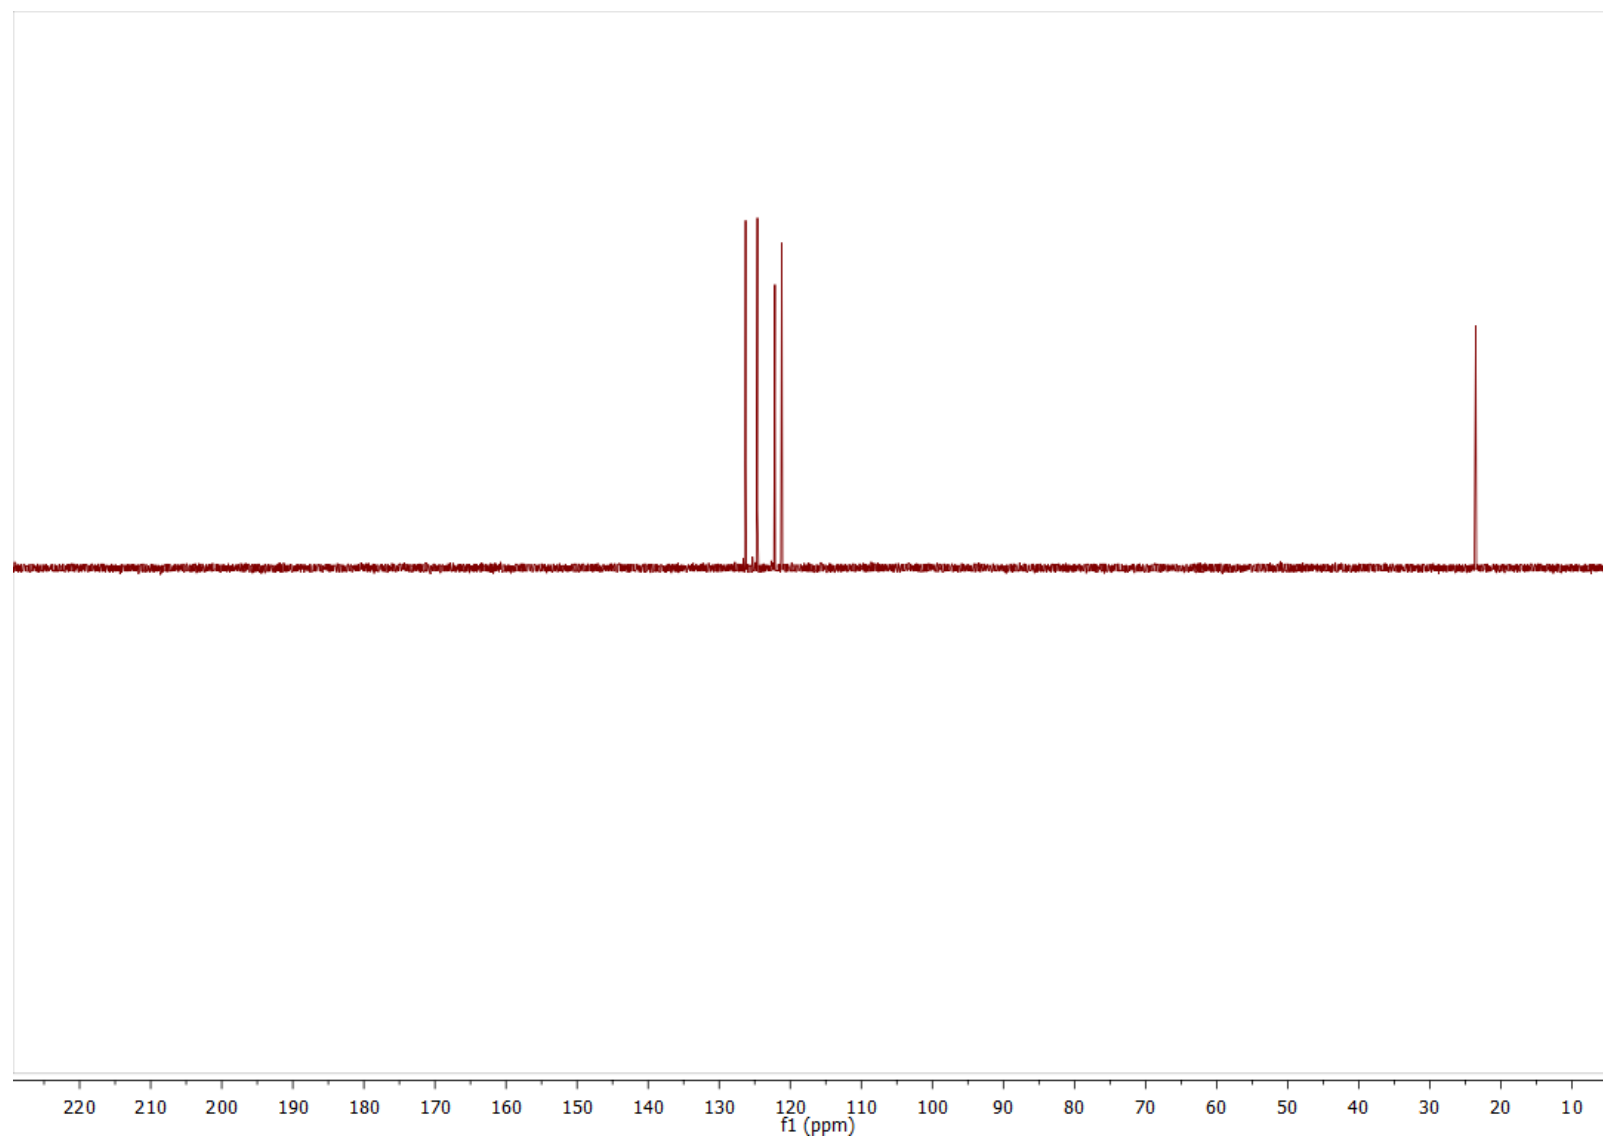

**Figure S4:**  $^{13}\text{C}$ -DEPT spectrum ( $\text{CDCl}_3$ , 125 MHz) of **41**.

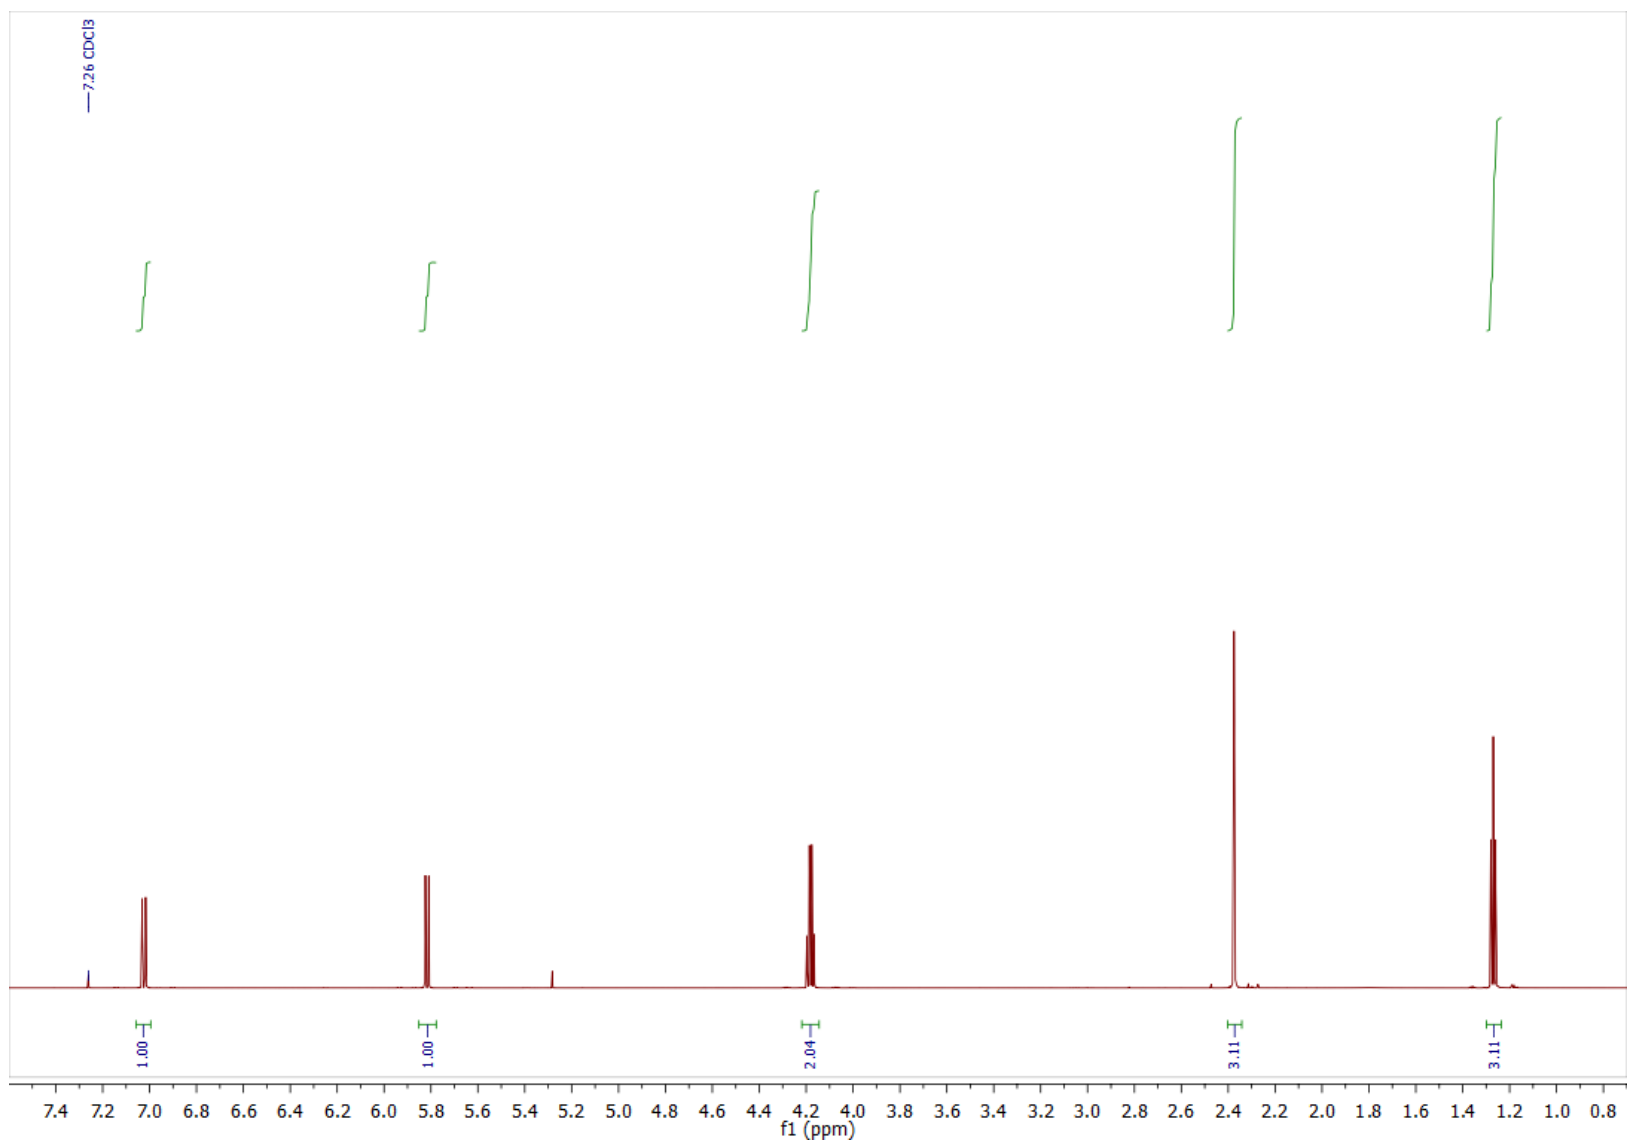

**Figure S5:**  $^1\text{H}$  NMR spectrum ( $\text{CDCl}_3$ , 700 MHz) of (Z)-42.

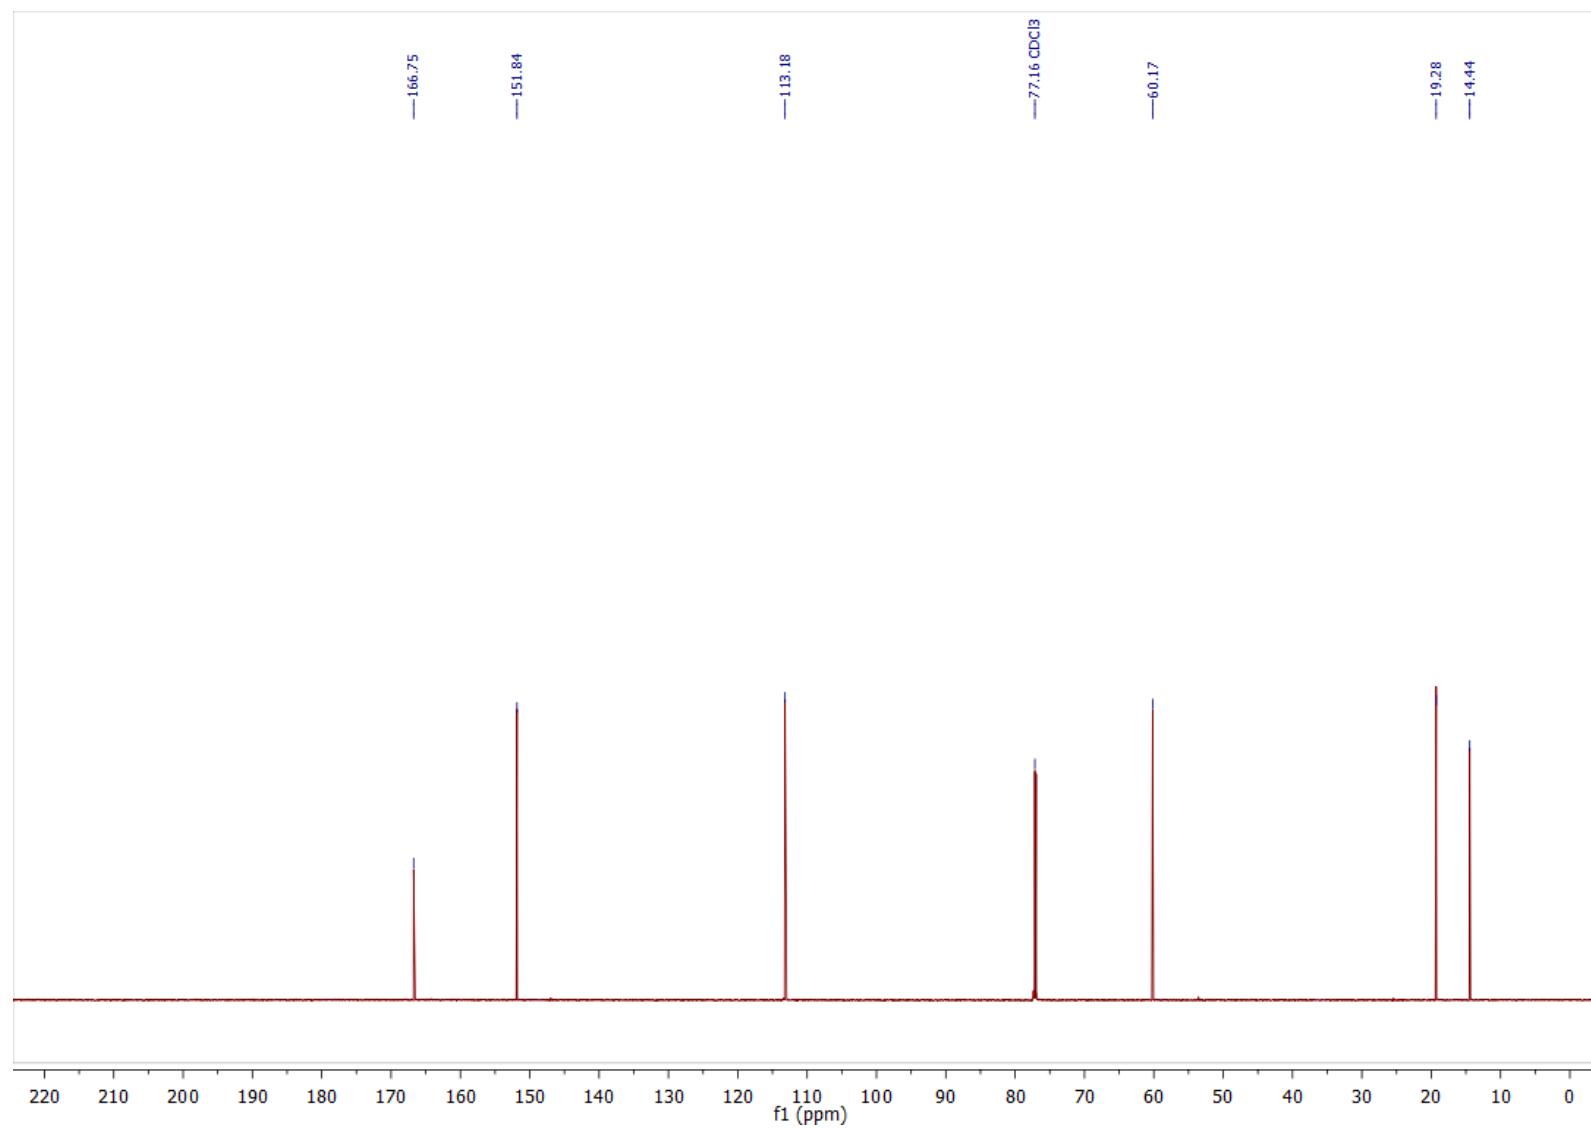

**Figure S6:** <sup>13</sup>C NMR spectrum (CDCl<sub>3</sub>, 175 MHz) of (Z)-42.



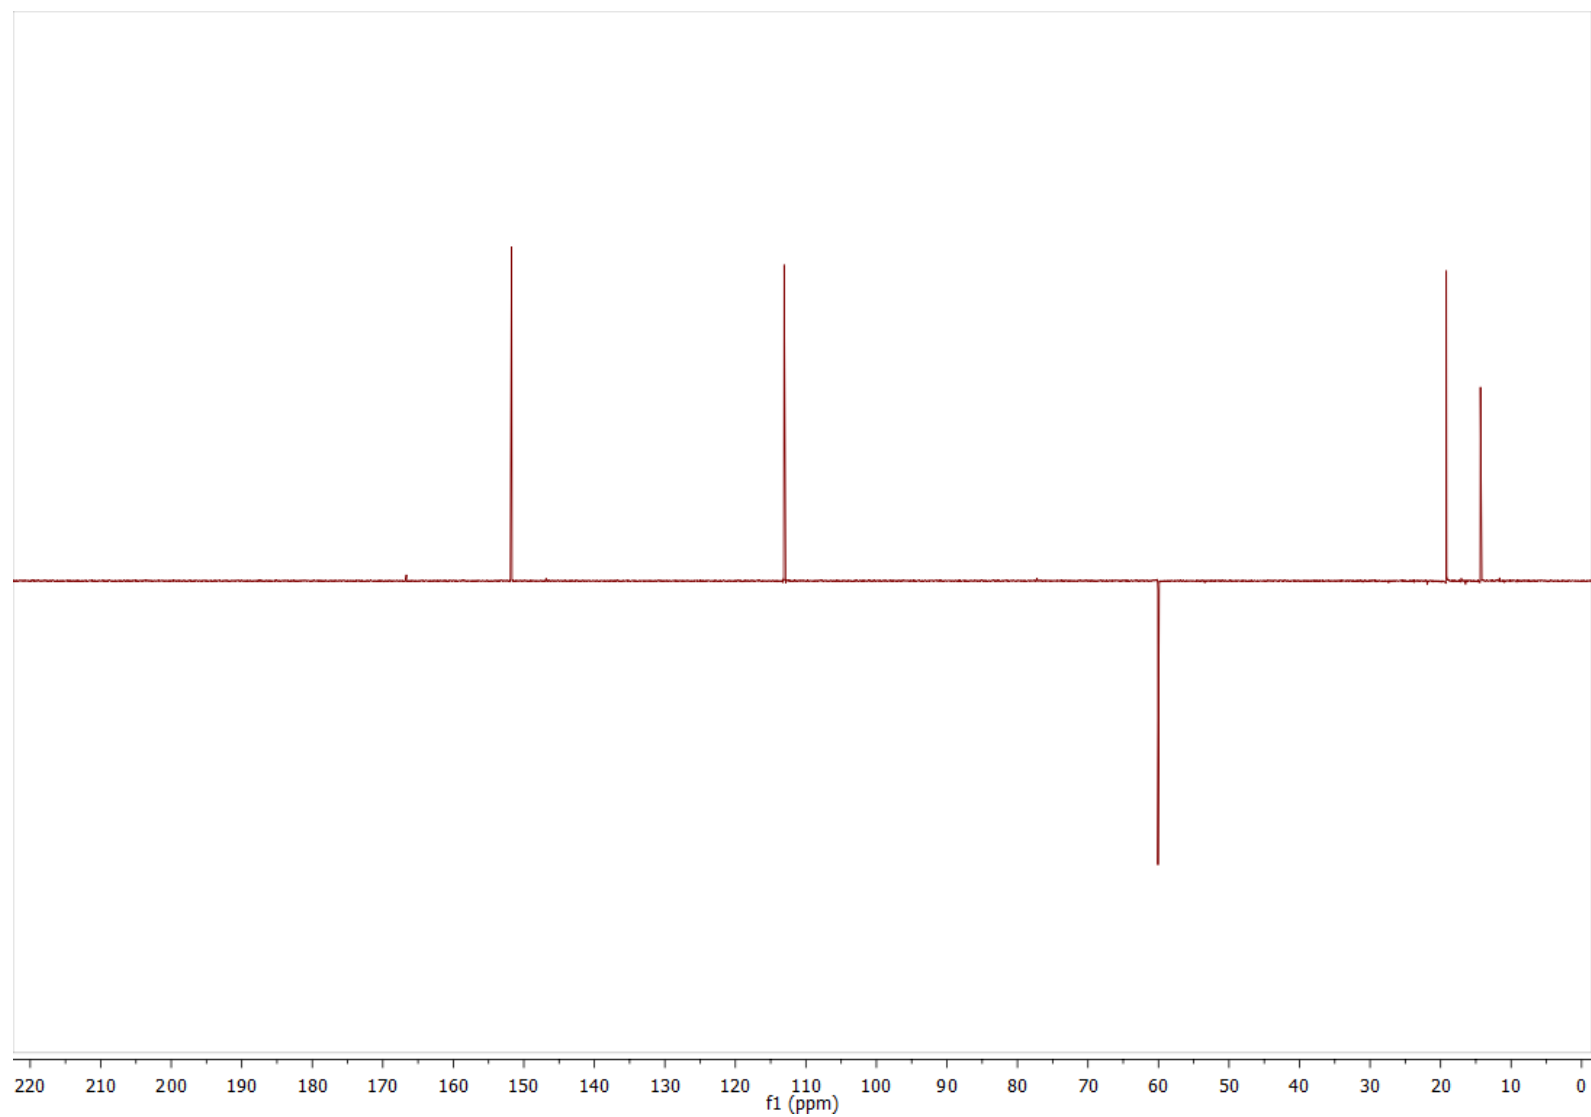

**Figure S7:**  $^{13}\text{C}$ -DEPT spectrum ( $\text{D}_2\text{O}$ , 175 MHz) of (Z)-42.

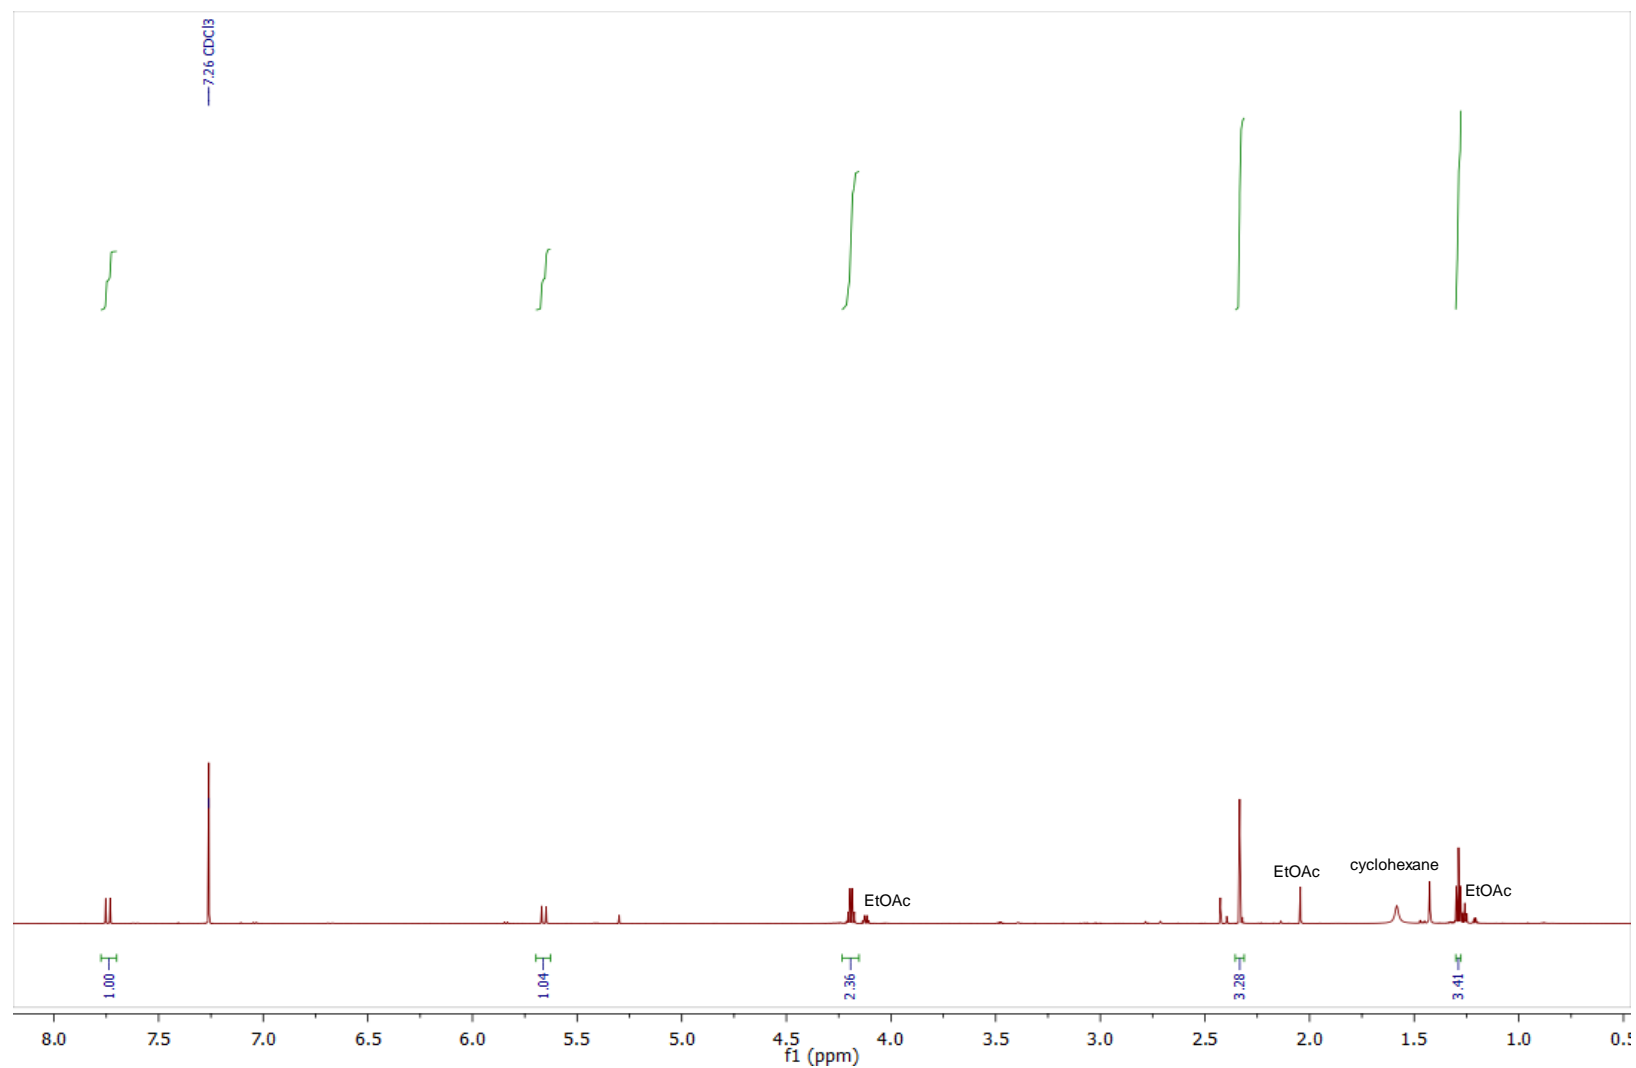

**Figure S8:**  $^1\text{H}$  NMR spectrum ( $\text{CDCl}_3$ , 700 MHz) of *(E)*-42. Minor impurities originate from solvents which were not rigorously removed, because the compound was obtained in small amounts and is volatile.

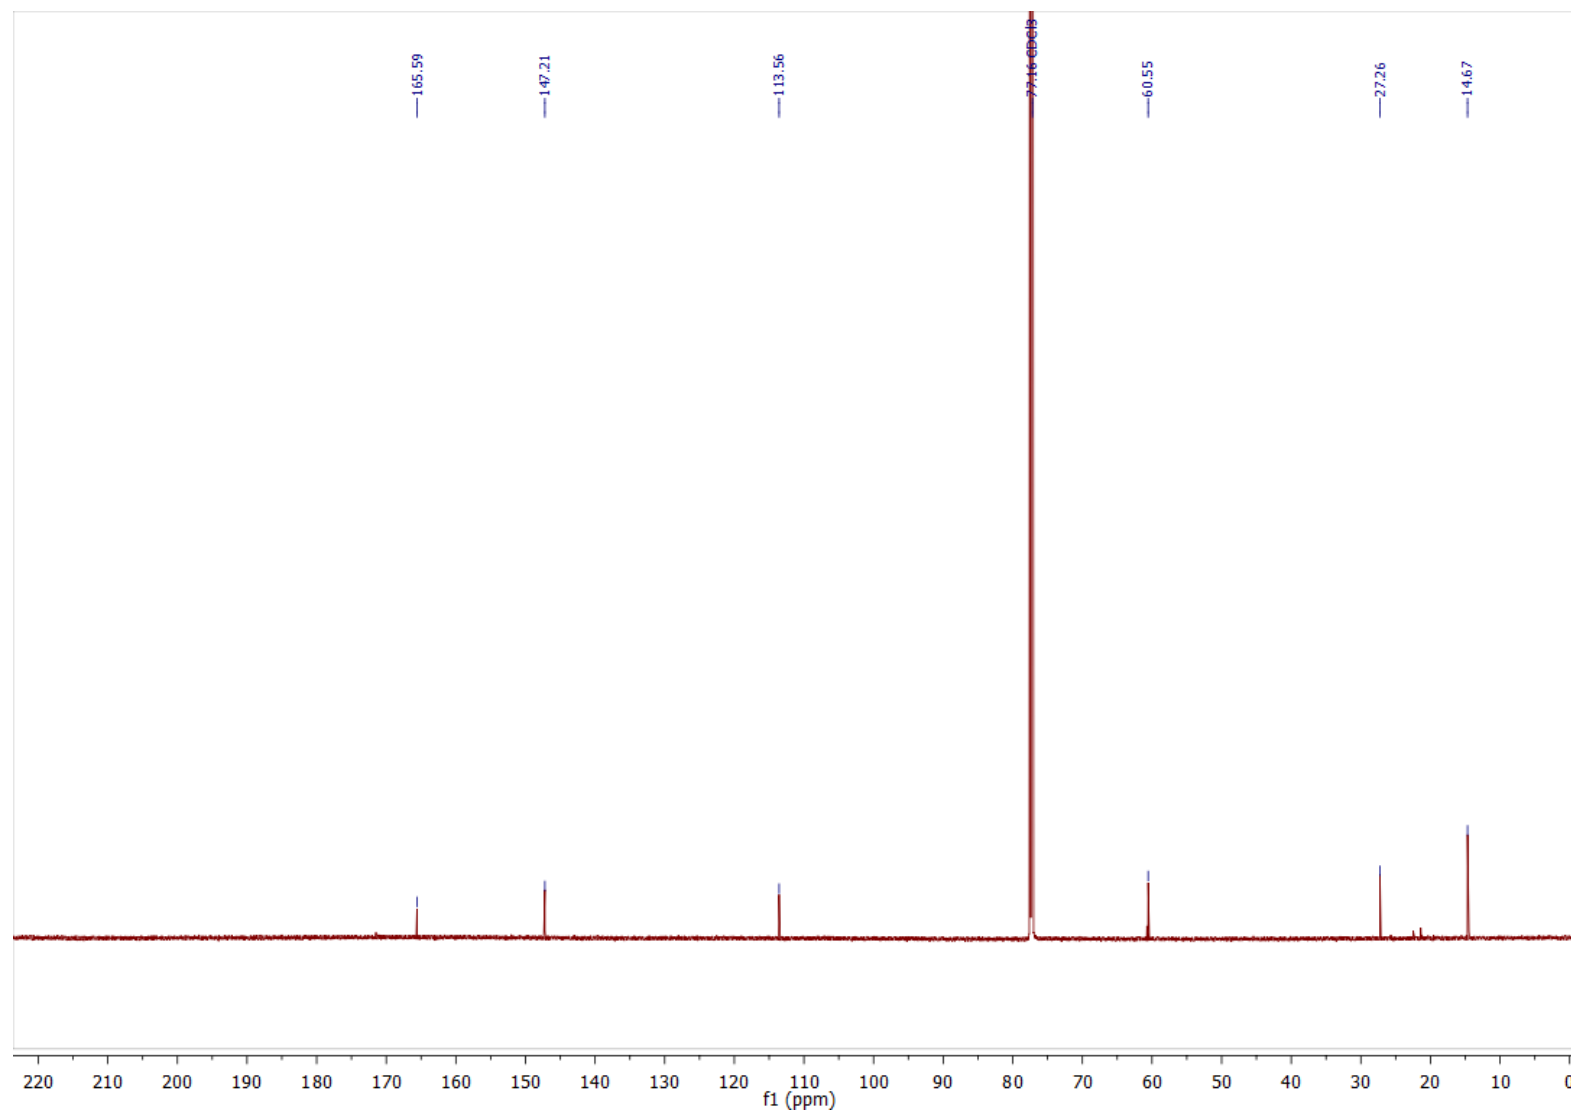

**Figure S9:**  $^{13}\text{C}$  NMR spectrum ( $\text{CDCl}_3$ , 175 MHz) of (E)-42.

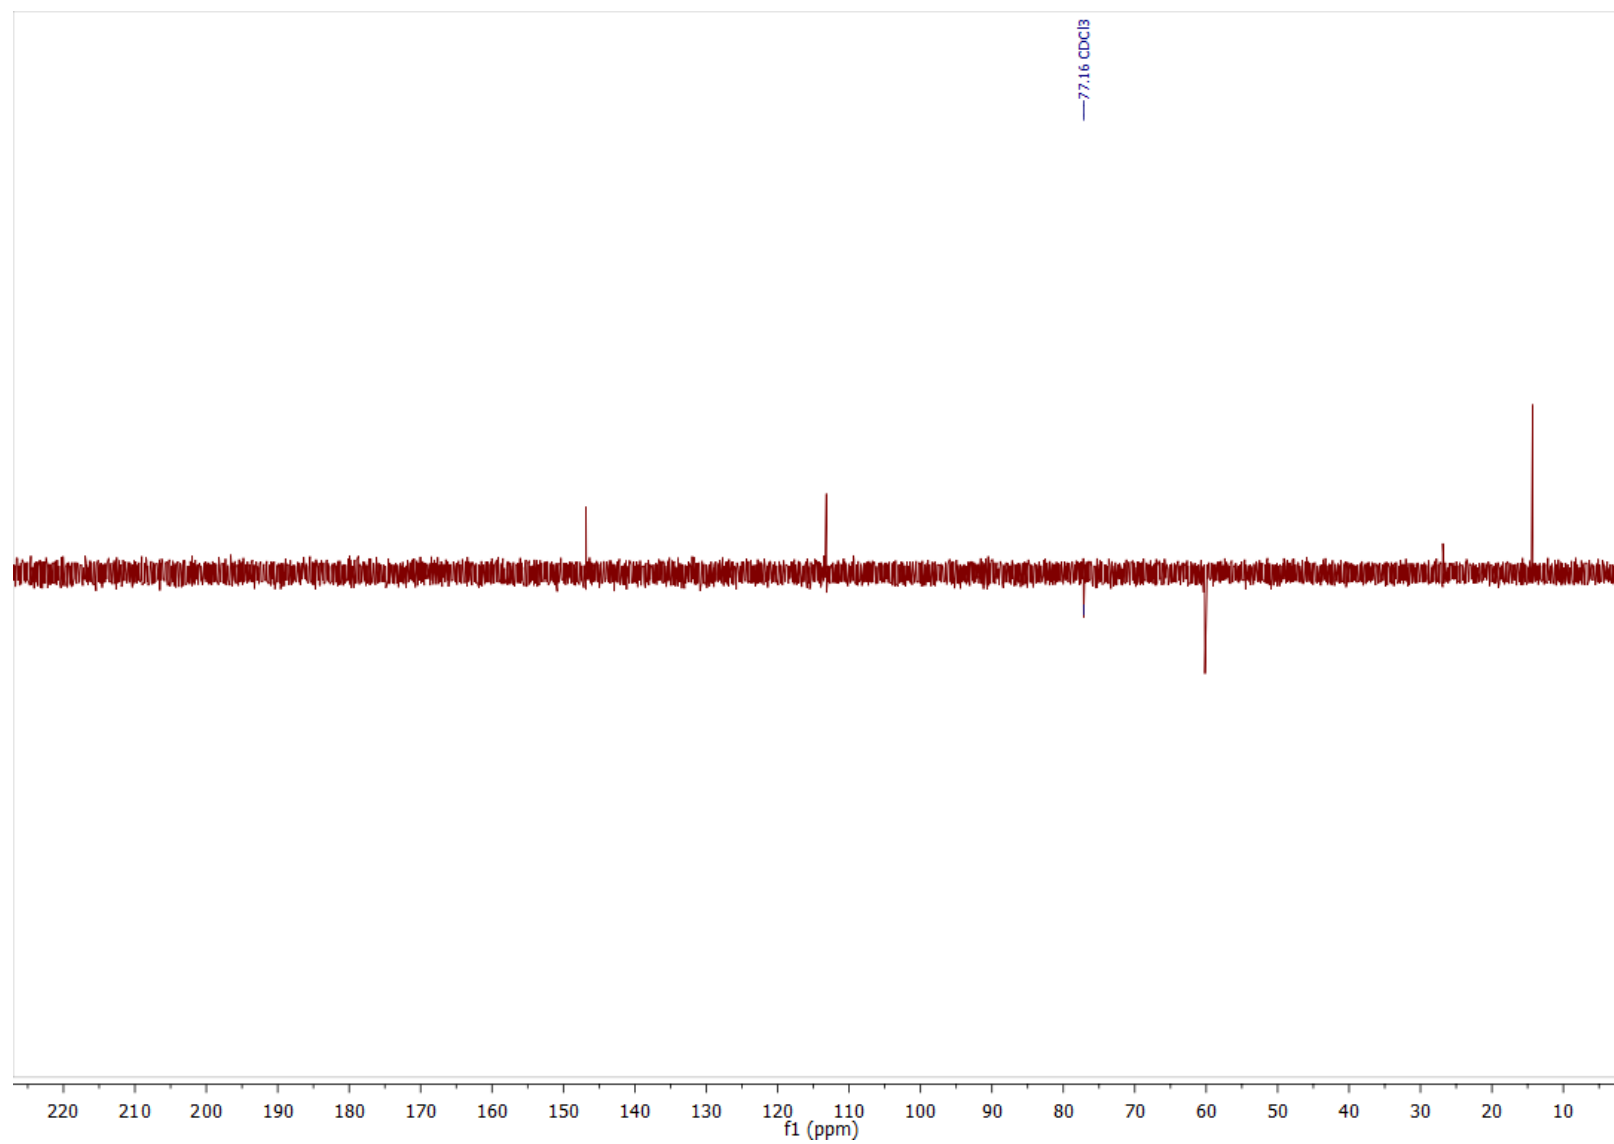

**Figure S10:**  $^{13}\text{C}$ -DEPT spectrum ( $\text{CDCl}_3$ , 175 MHz) of (E)-42.
